# Supplementary material for: Growth and Genome Features of Non-O1/O139 Vibrio cholerae Isolated from Three Species of Common Freshwater Fish
Source: MDPI journal article supplement (doi:10.3390/d16050268), 2024-04-30
Supplement: s1 [file s1]

## Supplementary Materials

**Table S1.** The phenotypes of the four *V. cholerae* isolates used in this study.

| <i>V. cholerae</i><br>Isolate | Source                          | Resistance |                                                                        | 16S rRNA Gene<br>(GeneBank Accession No.) |
|-------------------------------|---------------------------------|------------|------------------------------------------------------------------------|-------------------------------------------|
|                               |                                 | Antibiotic | Heavy Metal                                                            |                                           |
| 7-6-5                         | <i>Aristichthys nobilis</i>     | MXF/RIF    | Hg <sup>2+</sup> /Ni <sup>2+</sup> /Pb <sup>2+</sup> /Zn <sup>2+</sup> | OR984968                                  |
| L10-48                        | <i>Aristichthys nobilis</i>     | AMP/STR    | -                                                                      | OR984969                                  |
| L1-1                          | <i>Ctenopharyngodon idellus</i> | -          | Hg <sup>2+</sup> / Pb <sup>2+</sup>                                    | OR984970                                  |
| B5-86                         | <i>Parabramis pekinensis</i>    | STR        | Hg <sup>2+</sup> / Pb <sup>2+</sup> /Zn <sup>2+</sup>                  | OR984971                                  |

Note: AMP, Ampicillin; STR, Streptomycin; RIF, Rifampicin; MXF, Moxifloxacin.

**Table S2.** The seventy-one *V. cholerae* strains with genome sequences used in the phylogenetic tree.

| <i>V. cholerae</i><br>Isolate | Source       | Collection<br>Date | Serotype    | Location    | ST      | GenBank Accession No. |
|-------------------------------|--------------|--------------------|-------------|-------------|---------|-----------------------|
| 1154-74                       | Homo sapiens | 1974               | O49         | India       | 14      | GCA_000969235.1       |
| 10432-62                      | Homo sapiens | 1962               | O27         | Philippines | 741     | GCA_000969265.1       |
| 2559-78                       | Crab         | 1978               | O1          | USA         | 75      | GCA_001857145.1       |
| FC1877                        | Homo sapiens | 1995               | O139        | India       | 69      | GCA_002194155.1       |
| FC3611a                       | Homo sapiens | 1999               | O139        | India       | 69      | GCA_002194165.1       |
| FC3611b                       | Homo sapiens | 1997               | O139        | India       | 69      | GCA_002194185.1       |
| FC2273                        | Homo sapiens | 1998               | O139        | India       | 69      | GCA_002194215.1       |
| FC2271                        | Homo sapiens | 1997               | O139        | India       | 69      | GCA_002194235.1       |
| FC1384                        | Homo sapiens | 2000               | O139        | India       | 69      | GCA_002194245.1       |
| FC1341                        | Homo sapiens | 2002               | O139        | India       | 69      | GCA_002194265.1       |
| FC1105                        | Homo sapiens | 2003               | O139        | India       | 69      | GCA_002194295.1       |
| FC1817                        | Homo sapiens | 1994               | O139        | India       | 69      | GCA_002194305.1       |
| FC1225                        | Homo sapiens | 2001               | O139        | India       | 69      | GCA_002194335.1       |
| 234-93                        | Homo sapiens | 1993               | O141        | India       | 42      | GCA_000737005.1       |
| 254-93                        | Homo sapiens | 1993               | O144        | India       | 555     | GCA_000737025.1       |
| Vc306                         | Pork         | 2015               | Non-O1/O139 | China       | Unknown | GCA_016456645.1       |
| Vc3023                        | Pork         | 2015               | Non-O1/O139 | China       | Unknown | GCA_016456685.1       |
| Vc3022                        | Pork         | 2019               | Non-O1/O139 | China       | Unknown | GCA_016456695.1       |
| Vc382                         | Pork         | 2015               | Non-O1/O139 | China       | Unknown | GCA_016456725.1       |
| Vc3024                        | Pork         | 2019               | Non-O1/O139 | China       | Unknown | GCA_016456735.1       |
| Vc3021                        | Pork         | 2019               | Non-O1/O139 | China       | Unknown | GCA_016456755.1       |
| Vc226                         | Chicken      | 2015               | Non-O1/O139 | China       | Unknown | GCA_016456785.1       |
| Vc2634                        | Shrimp       | 2017               | Non-O1/O139 | China       | Unknown | GCA_016456805.1       |
| Vc2632                        | Shrimp       | 2017               | Non-O1/O139 | China       | Unknown | GCA_016456815.1       |
| Vc2633                        | Shrimp       | 2017               | Non-O1/O139 | China       | Unknown | GCA_016456845.1       |
| Vc1461                        | Chicken      | 2016               | Non-O1/O139 | China       | Unknown | GCA_016456915.1       |
| Vc601                         | Shrimp       | 2015               | Non-O1/O139 | China       | Unknown | GCA_016456945.1       |
| Vc730                         | Shrimp       | 2015               | Non-O1/O139 | China       | Unknown | GCA_016456985.1       |
| Vc401                         | Shrimp       | 2015               | Non-O1/O139 | China       | Unknown | GCA_016456995.1       |
| Vc518                         | Shrimp       | 2015               | Non-O1/O139 | China       | Unknown | GCA_016457045.1       |
| Vc515                         | Pork         | 2015               | Non-O1/O139 | China       | Unknown | GCA_016457055.1       |
| Vc514                         | Pork         | 2015               | Non-O1/O139 | China       | Unknown | GCA_016457095.1       |
| Vc384                         | Shrimp       | 2015               | Non-O1/O139 | China       | Unknown | GCA_016457125.1       |
| Vc383                         | Pork         | 2015               | Non-O1/O139 | China       | Unknown | GCA_016457135.1       |
| Vc3012                        | Shrimp       | 2019               | Non-O1/O139 | China       | Unknown | GCA_016457155.1       |
| Vc2932                        | Shrimp       | 2019               | Non-O1/O139 | China       | Unknown | GCA_016457185.1       |
| Vc3013                        | Shrimp       | 2019               | Non-O1/O139 | China       | Unknown | GCA_016457205.1       |
| CISM_0015                     | Homo sapiens | 2002               | O1          | Mozambique  | 69      | GCA_002099055.1       |
| CISM_0016                     | Homo sapiens | 2002               | O1          | Mozambique  | 69      | GCA_002099035.1       |
| CISM_0017                     | Homo sapiens | 2002               | O1          | Mozambique  | 69      | GCA_002099015.1       |
| CISM_0018                     | Homo sapiens | 2002               | O1          | Mozambique  | 69      | GCA_002098995.1       |
| CISM_0019                     | Homo sapiens | 2002               | O1          | Mozambique  | 69      | GCA_002098965.1       |
| CISM_100                      | Homo sapiens | 2003               | O1          | Mozambique  | 69      | GCA_002098835.1       |
| CISM_101                      | Homo sapiens | 2003               | O1          | Mozambique  | 69      | GCA_002098765.1       |

|             |                                 |      |             |            |         |                 |
|-------------|---------------------------------|------|-------------|------------|---------|-----------------|
| CISM_105    | Homo sapiens                    | 2003 | O1          | Mozambique | 69      | GCA_002098695.1 |
| CISM_120    | Homo sapiens                    | 2003 | O1          | Mozambique | 69      | GCA_002098675.1 |
| CISM_121    | Homo sapiens                    | 2003 | O1          | Mozambique | 69      | GCA_002098655.1 |
| CISM_300043 | Homo sapiens                    | 2008 | O1          | Mozambique | 69      | GCA_002098295.1 |
| CISM_300055 | Homo sapiens                    | 2008 | Non-O1      | Mozambique | 766     | GCA_002097735.1 |
| CISM_300205 | Homo sapiens                    | 2008 | Non-O1      | Mozambique | 733     | GCA_002097745.1 |
| CISM_300208 | Homo sapiens                    | 2008 | O1          | Mozambique | 69      | GCA_002098345.1 |
| CISM_300209 | Homo sapiens                    | 2008 | O1          | Mozambique | 69      | GCA_002098335.1 |
| CISM_300215 | Homo sapiens                    | 2008 | O1          | Mozambique | 69      | GCA_002098255.1 |
| CISM_302015 | Homo sapiens                    | 2009 | O1          | Mozambique | 69      | GCA_002098225.1 |
| CISM_302029 | Homo sapiens                    | 2009 | O1          | Mozambique | 69      | GCA_002098235.1 |
| BD02        | Environmental                   | 2013 | Non-O1/O139 | Bangladesh | 1018    | GCA_013111535.1 |
| BD03        | Environmental                   | 2013 | Non-O1/O139 | Bangladesh | 1265    | GCA_003348515.1 |
| BD04        | Environmental                   | 2013 | Non-O1/O139 | Bangladesh | 1274    | GCA_003348485.1 |
| BD06        | Environmental                   | 2013 | Non-O1/O139 | Bangladesh | 1268    | GCA_003348715.1 |
| BD07        | Environmental                   | 2013 | Non-O1/O139 | Bangladesh | 1270    | GCA_003348675.1 |
| BD10        | Environmental                   | 2013 | Non-O1/O139 | Bangladesh | 1277    | GCA_003348405.1 |
| BD12        | Environmental                   | 2013 | Non-O1/O139 | Bangladesh | 1265    | GCA_003348355.1 |
| BD13        | Environmental                   | 2013 | Non-O1/O139 | Bangladesh | 1265    | GCA_003348395.1 |
| BD14        | Environmental                   | 2013 | Non-O1/O139 | Bangladesh | 1106    | GCA_003348655.1 |
| BD15        | Environmental                   | 2013 | Non-O1/O139 | Bangladesh | 1265    | GCA_003348665.1 |
| BD18        | Environmental                   | 2013 | Non-O1/O139 | Bangladesh | 1299    | GCA_003348365.1 |
| BD20        | Environmental                   | 2013 | Non-O1/O139 | Bangladesh | 1265    | GCA_003348595.1 |
| 7-6-5       | <i>Aristichthys nobilis</i>     | 2018 | Non-O1/O139 | China      | Unknown | SAMN37882014    |
| L10-48      | <i>Aristichthys nobilis</i>     | 2018 | Non-O1/O139 | China      | Unknown | SAMN37882015    |
| L1-1        | <i>Ctenopharyngodon idellus</i> | 2018 | Non-O1/O139 | China      | 884     | SAMN37882016    |
| B5-86       | <i>Parabramis pekinensis</i>    | 2018 | Non-O1/O139 | China      | Unknown | SAMN37882017    |

**Table S3.** The identified repeats in the four *V. cholerae* genomes.

| <i>V. cholerae</i> Isolate | Repeat ID        | Location   | Scaffold Size (bp) | Repeat (bp) |     |        |
|----------------------------|------------------|------------|--------------------|-------------|-----|--------|
|                            |                  |            |                    | Start       | End | Length |
| 7-6-5                      | Scaffold17_TR021 | Scaffold17 | 69,081             | 156         | 404 | 249    |
|                            | Scaffold24_TR031 | Scaffold24 | 58,709             | 156         | 363 | 208    |
|                            | Scaffold40_TR046 | Scaffold40 | 32,671             | 204         | 376 | 173    |
|                            | Scaffold12_TR016 | Scaffold12 | 75,784             | 257         | 490 | 234    |
| L10-48                     | Scaffold16_TR036 | Scaffold16 | 56,526             | 156         | 392 | 237    |
|                            | Scaffold8_TR022  | Scaffold8  | 179,095            | 256         | 482 | 227    |
|                            | Scaffold6_TR020  | Scaffold6  | 301,187            | 270         | 478 | 209    |
|                            | Scaffold20_TR046 | Scaffold20 | 19,182             | 298         | 540 | 243    |
| L1-1                       | Scaffold23_TR42  | Scaffold23 | 17,129             | 1           | 539 | 539    |
|                            | Scaffold23_TR43  | Scaffold23 | 17,129             | 249         | 545 | 297    |
| B5-86                      | Scaffold7_TR28   | Scaffold7  | 179,132            | 1           | 359 | 359    |
|                            | Scaffold8_TR31   | Scaffold8  | 148,220            | 4           | 582 | 579    |
|                            | Scaffold6_TR27   | Scaffold6  | 246,682            | 110         | 314 | 205    |
|                            | Scaffold11_TR38  | Scaffold11 | 76,558             | 196         | 424 | 229    |
|                            | Scaffold19_TR50  | Scaffold19 | 11,414             | 210         | 469 | 260    |

**Table S4.** The identified GIs in the four *V. cholerae* genomes.

| <i>V. cholerae</i><br>Isolate | GI<br>ID | Location   | Start<br>(bp) | End<br>(bp) | CDS<br>No | COG<br>No |
|-------------------------------|----------|------------|---------------|-------------|-----------|-----------|
| 7-6-5                         | GI 1     | Scaffold2  | 46,639        | 60,249      | 16        | 15        |
|                               | GI 2     | Scaffold5  | 16,316        | 24,037      | 8         | 8         |
|                               | GI 3     | Scaffold13 | 1,507         | 7,277       | 7         | 6         |
|                               | GI 4     | Scaffold14 | 1,759         | 7,379       | 9         | 0         |
| L10-48                        | GI 1     | Scaffold1  | 259,476       | 289,266     | 23        | 12        |
|                               | GI 2     | Scaffold2  | 59,819        | 68,563      | 10        | 4         |
|                               | GI 3     | Scaffold2  | 606,572       | 617,062     | 9         | 8         |
|                               | GI 4     | Scaffold3  | 71,330        | 108,375     | 36        | 28        |
|                               | GI 5     | Scaffold5  | 46,036        | 70,975      | 26        | 14        |
|                               | GI 6     | Scaffold9  | 28,986        | 40,521      | 14        | 13        |
|                               | GI 7     | Scaffold11 | 24,988        | 32,438      | 10        | 3         |
|                               | GI 8     | Scaffold15 | 4,549         | 5,851       | 9         | 3         |
|                               | GI 9     | Scaffold18 | 27,601        | 41,655      | 10        | 6         |
|                               | GI 1     | Scaffold1  | 192,650       | 204,060     | 14        | 4         |
| L1-1                          | GI 2     | Scaffold2  | 278,864       | 284,922     | 7         | 5         |
|                               | GI 3     | Scaffold2  | 292,972       | 298,523     | 7         | 4         |
|                               | GI 4     | Scaffold3  | 122,483       | 129,810     | 7         | 7         |
|                               | GI 5     | Scaffold10 | 76,226        | 89,255      | 15        | 14        |
|                               | GI 6     | Scaffold12 | 74,102        | 79,563      | 8         | 3         |
|                               | GI 1     | Scaffold2  | 97,080        | 123,738     | 27        | 18        |
| B5-86                         | GI 2     | Scaffold3  | 253,804       | 281,076     | 32        | 13        |
|                               | GI 3     | Scaffold5  | 5,926         | 18,760      | 13        | 11        |
|                               | GI 4     | Scaffold8  | 57,738        | 69,124      | 14        | 13        |

**Table S5.** The identified prophages in the four *V. cholerae* genomes.

| <i>V. cholerae</i><br>Isolate | Prophage<br>ID | Location  | Prophage<br>Size (bp) | Start<br>(bp) | End<br>(bp) | Predicted Phage                                   | NCBI Accession<br>No. |
|-------------------------------|----------------|-----------|-----------------------|---------------|-------------|---------------------------------------------------|-----------------------|
| L10-48                        | Ph 1           | Scaffold2 | 24,437                | 40,094        | 64,530      | <i>Burkholderia_cenocepacia</i> _phage_B<br>cepMa | NC_005882             |
| L1-1                          | Ph 2           | Scaffold5 | 42,272                | 20,245        | 62,516      | <i>Escherichia</i> _phage_Arg0145                 | NC_049918             |
|                               | Ph 1           | Scaffold1 | 38,198                | 159,833       | 198,030     | <i>Escherichia</i> _phage_lys12581Vzw             | NC_049917             |
|                               | Ph 2           | Scaffold2 | 42,593                | 278,864       | 321,456     | <i>Vibrio</i> _phage_VHML                         | NC_004456             |
|                               | Ph 3           | Scaffold7 | 9,538                 | 45,274        | 54,811      | <i>Vibrio</i> _phage_VCY_phi                      | NC_016162             |
| B5-86                         | Ph 1           | Scaffold3 | 40,712                | 258,721       | 299,432     | Stx2_converting_phage_Stx2a_F45<br>1              | NC_049924             |

**Table S6:** The identified Ins in the four *V. cholerae* genomes.

| <i>V. cholerae</i> Isolate | In ID | Location   | Ins Size<br>(bp) | Start<br>(bp) | End<br>(bp) | CDS Gene |
|----------------------------|-------|------------|------------------|---------------|-------------|----------|
| 7-6-5                      | In 1  | Scaffold13 | 3,939            | 80            | 4,019       | 3        |
| L10-48                     | In 1  | Scaffold6  | 4,073            | 455           | 4,528       | 3        |
| L1-1                       | In 1  | Scaffold8  | 2,759            | 83            | 2,842       | 1        |
| B5-86                      | In 1  | Scaffold5  | 13,159           | 53            | 13,212      | 7        |

**Table S7:** The identified ISs in the four *V. cholerae* genomes.

| <i>V. cholerae</i><br>Isolate | IS ID | Location   | IS Size<br>(bp) | Start<br>(bp) | End<br>(bp) | IS Family   |
|-------------------------------|-------|------------|-----------------|---------------|-------------|-------------|
| L10-48                        | IS001 | Scaffold3  | 1,238           | 104,563       | 105,800     | ISAs1       |
|                               | IS003 | Scaffold6  | 1,045           | 602           | 1,646       | IS30        |
|                               | IS002 | Scaffold3  | 961             | 97,205        | 98,165      | IS5         |
| L1-1                          | IS001 | Scaffold50 | 1,186           | 1             | 1,186       | IS3         |
| B5-86                         | IS001 | Scaffold9  | 1,551           | 59,839        | 61,389      | IS4         |
|                               | IS002 | Scaffold11 | 620             | 17,961        | 18,580      | IS200/IS605 |

**Table S8:** The identified CRISPR-Cas arrays in the four *V. cholerae* genomes.

| <i>V. cholerae</i> Isolate | Location   | Cas Type     | Start (bp) | End (bp)  | Cas Gene                                                                                                                                             |
|----------------------------|------------|--------------|------------|-----------|------------------------------------------------------------------------------------------------------------------------------------------------------|
| 7-6-5                      | Scaffold3  | CAS-Type I F | 505,536    | 506,174   | <i>cas6f</i> (Vc 7_6_5_0501)                                                                                                                         |
| 7-6-5                      | Scaffold40 | CAS-Type I F | 2,784,077  | 2,783,526 | <i>cas6f</i> (Vc 7_6_5_2545)                                                                                                                         |
| 7-6-5                      | Scaffold64 | CAS-Type I F | 3,358,954  | 3,358,316 | <i>cas6f</i> (Vc 7_6_5_3049)                                                                                                                         |
| L10-48                     | Scaffold11 | CAS-Type I E | 3,478,417  | 3,482,939 | <i>casA</i> (Vc L10_48_3096), <i>casB</i> (Vc L10_48_3095), <i>casC</i> (Vc L10_48_3093), <i>casD</i> (Vc L10_48_3092), <i>casE</i> (Vc L10_48_3094) |
| L1-1                       | Scaffold2  | CAS-Type I F | 492,370    | 491,819   | <i>cas6f</i> (Vc L1_1_0413)                                                                                                                          |

**Table S9.** The potential virulence factors-encoding genes identified in the four *V. cholerae* genomes.

| Virulence Factor | <i>V. cholerae</i> Genome  | Reference |
|------------------|----------------------------|-----------|
| Flagella         | 7-6-5, L10-48, L1-1, B5-86 | [58]      |
| MSHA pili        | 7-6-5, L1-1, B5-86         | [59]      |
| AI-2             | 7-6-5, L1-1                | [60]      |
| Hcp2             | 7-6-5, L10-48, L1-1        | [61]      |
| LOS              | 7-6-5, L10-48, L1-1, B5-86 | [45]      |
| llpA             | 7-6-5, L10-48, L1-1, B5-86 | [62]      |
| EF-Tu            | 7-6-5, L10-48, L1-1, B5-86 | [44]      |
| RTX toxin        | 7-6-5, L10-48, L1-1, B5-86 | [63]      |
| T6SS             | 7-6-5, L10-48, L1-1, B5-86 | [42]      |
| CAI-1            | 7-6-5, L10-48, L1-1, B5-86 | [64]      |
| T3SS2            | L10-48, B5-86              | [43]      |
| MARTX            | B5-86                      | [46]      |
| VCC              | L1-1, B5-86                | [47]      |
| Zot              | L1-1, B5-86                | [51]      |

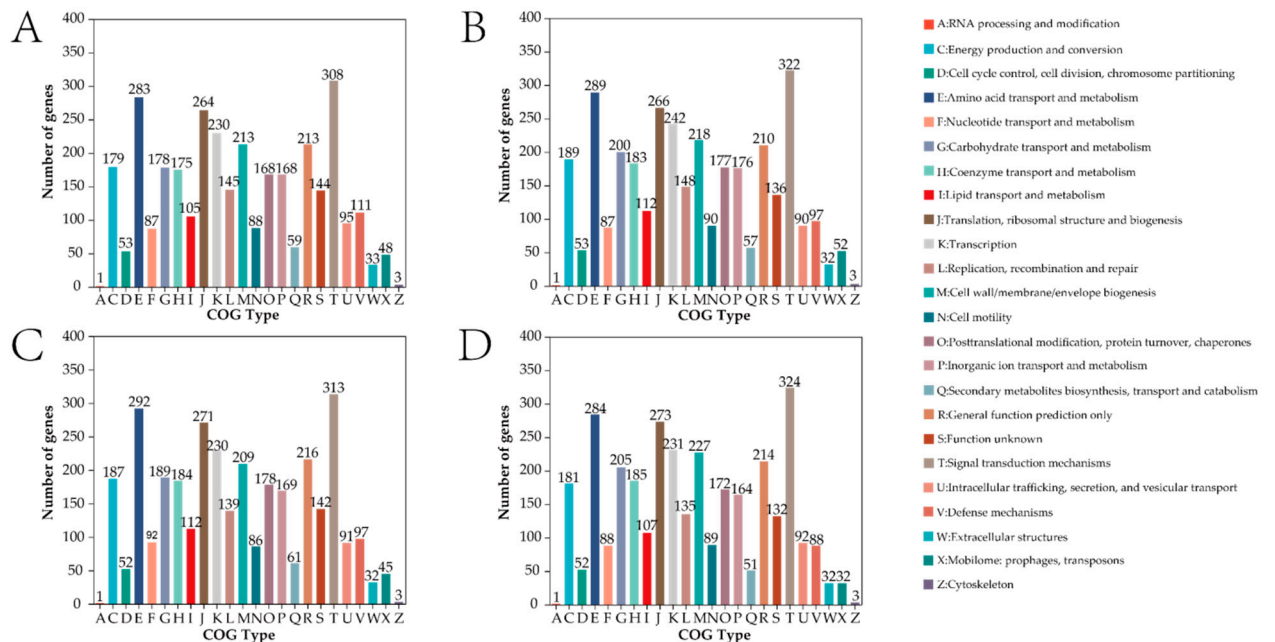**Figure S1.** The gene function of the GIs identified in the four *V. cholerae* genomes. Different colors referred to COG classification to mark gene function and genes not annotated to COG database were displayed in grey. (A-D), the *V. cholerae* 7-6-5, L10-48, L1-1, and B5-86 genomes, respectively.

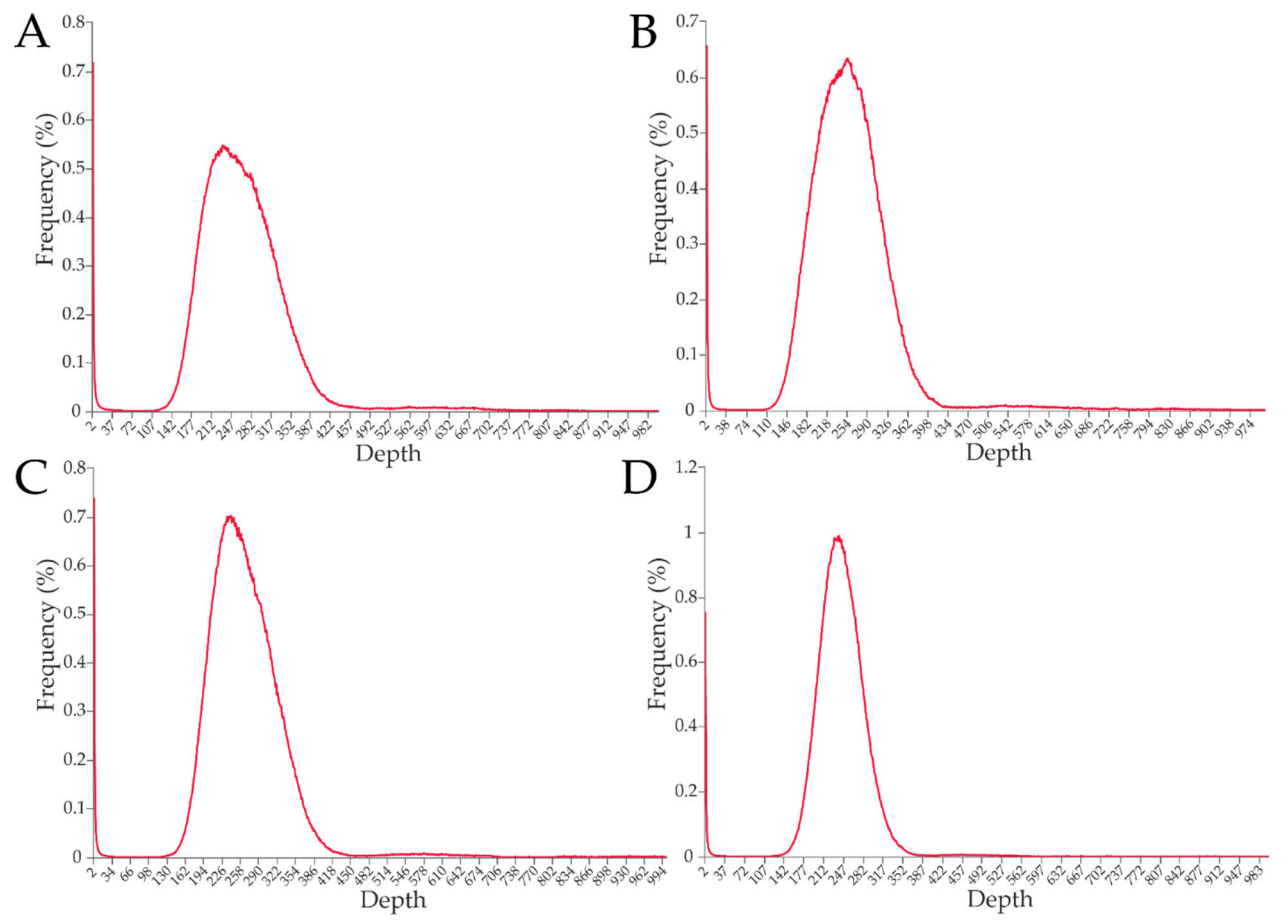

**Figure S2.** The k-mer analysis for the four *V. cholerae* subread data based on the number of unique 17-mers. (A-D), the *V. cholerae* 7-6-5, L10-48, L1-1, and B5-86 genomes, respectively.

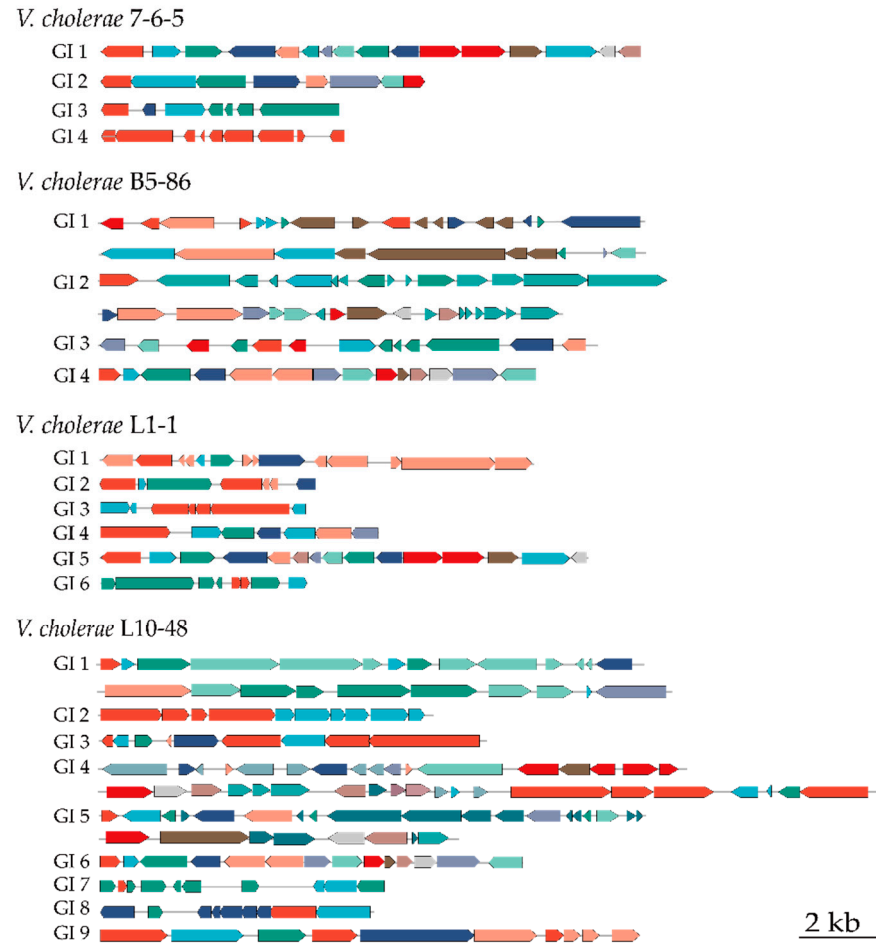

**Figure S3.** Gene organizations of the GIs identified in the four *V. cholerae* genomes. Different colors referred to COG classification in Figure S1.

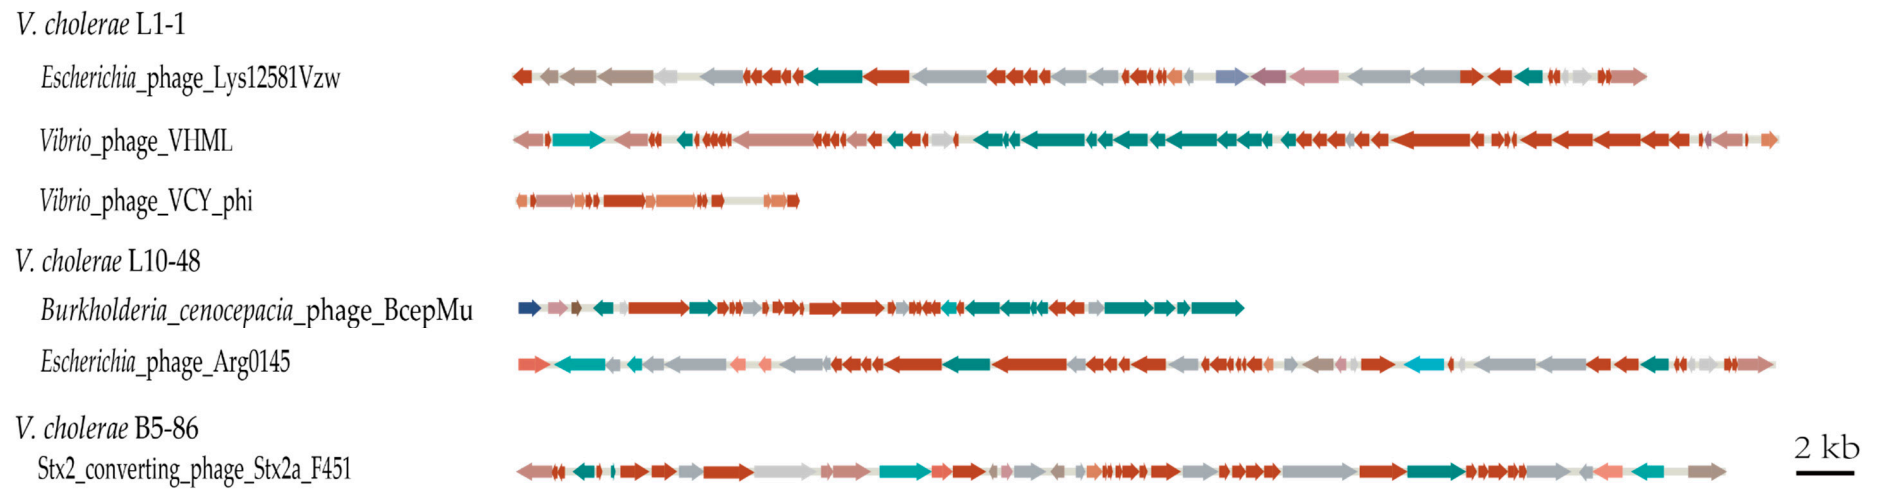

**Figure S4.** The structure diagram of the prophage gene clusters identified in the four *V. cholerae* genomes.

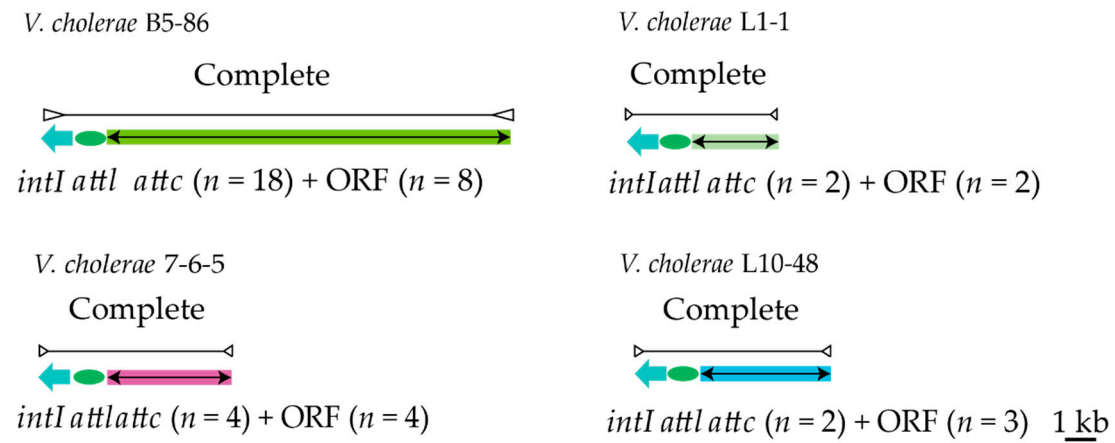

**Figure S5.** The structure diagram of the Ins identified in the four *V. cholerae* genomes.



*V. cholerae* 7-6-5

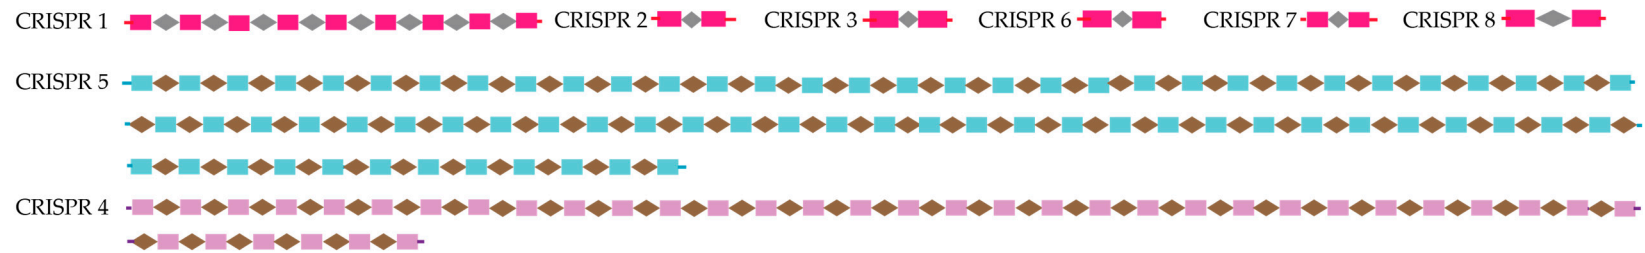

*V. cholerae* L10-48

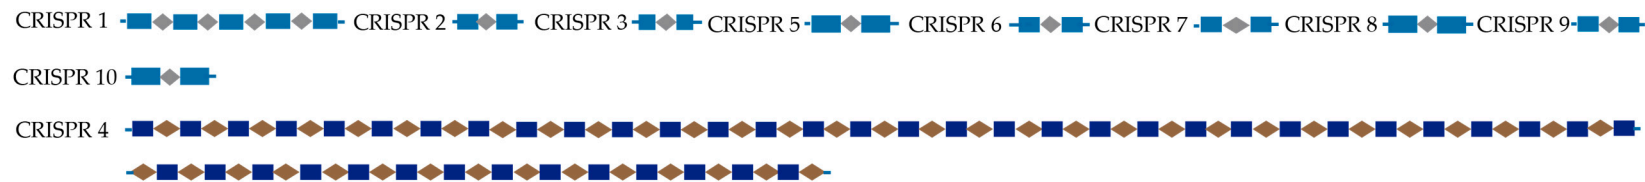

*V. cholerae* L1-1

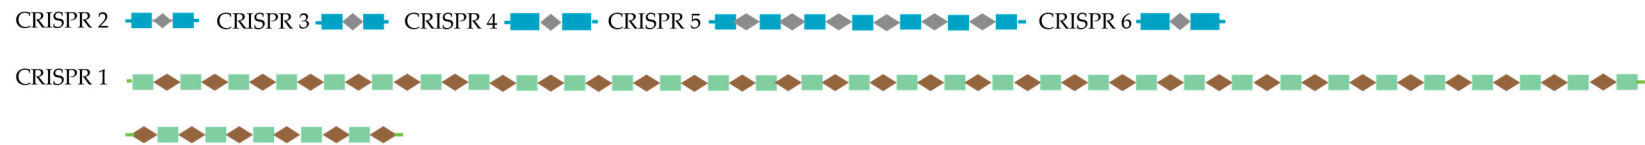

*V. cholerae* B5-86

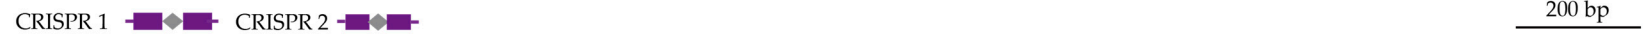

**Figure S6.** The structural features of the CRISPR arrays identified in the four *V. cholerae* genomes. The repeat sequences were shown by the rectangle of different colors and the spacer regions were represented by rhombuses of different colors.

## References

58. Syed, K.A.; Beyhan, S.; Correa, N.; Queen, J.; Liu, J.; Peng, F.; Satchell, K.J.F. Yildiz, F.; Klose, K.E. The *Vibrio cholerae* flagellar regulatory hierarchy controls expression of virulence factors. *J. Bacteriol.* **2009**, *191*, 6555–6570. <https://doi.org/10.1128/JB.00949-09>.
59. Utada, A.S.; Bennett, R.R.; Fong, J.C.N.; Gibiansky, M.L.; Yildiz, F.H.; Golestanian, R.; Wong, G.C.L. *Vibrio cholerae* use pili and flagella synergistically to effect motility switching and conditional surface attachment. *Nat. Commun.* **2014**, *5*, 4913. <https://doi.org/10.1038/ncomms5913>.
60. Chen, X.; Schauder, S.; Potier, N.; Dorselaer, A.V.; Pelczar, I.; Bassler, B.L.; Hughson, F.M. Structural identification of a bacterial quorum-sensing signal containing boron. *Nature.* **2002**, *415*, 545–549. <https://doi.org/10.1038/415545a>.
61. Chen, L.; Yang, J.; Yu, J.; Yao, Z.; Sun, L.; Shen, Y.; Jin, Q. VFDB: a reference database for bacterial virulence factors. *Nucleic. Acids. Res.* **2005**, *33*, D325–D328. <https://doi.org/10.1093/nar/gki008>.
62. Lee, N.Y.; Lee, H.Y.; Lee, K.H.; Han, S.H.; Park, S.J. *Vibrio vulnificus* IlpA induces MAPK-mediated cytokine production via TLR1/2 activation in THP-1 cells, a human monocytic cell line. *Mol. Immunol.* **2011**, *49*, 143–154. <https://doi.org/10.1016/j.molimm.2011.08.001>.
63. Fullner, K.J.; Mekalanos, J.J. *In vivo* covalent cross-linking of cellular actin by the *Vibrio cholerae* RTX toxin. *EMBO J.* **2000**, *19*, 5315–5323. <https://doi.org/10.1093/emboj/19.20.5315>.
64. Higgins, D.A.; Pomianek, M.E.; Kraml, C.M.; Taylor, R.K.; Semmelhack, M.F.; Bassler, B.L. The major *Vibrio cholerae* autoinducer and its role in virulence factor production. *Nature.* **2007**, *450*, 883–886. <https://doi.org/10.1038/nature06284>.
